# Supplementary material
Source: publisher figshare collection journal article supplement (https://acs.figshare.com/ndownloader/files/11105450)
Supplement: Supplementary file 1 [file 11105450]

## Supporting Information

for

### High Crystallinity Urchin-like VS<sub>4</sub> Anode for High-performance Lithium Ion Storage

*Guang Yang,<sup>a</sup> Bowei Zhang,<sup>b</sup> Jianyong Feng,<sup>a</sup> Huanhuan Wang,<sup>d</sup> Mingbo Ma,<sup>a</sup> Kang Huang,<sup>e</sup> Jilei Liu,<sup>f\*</sup> Srinivasan Madhavi,<sup>a,b\*</sup> Zexiang Shen<sup>a,b,c</sup> and Yizhong Huang<sup>a\*</sup>*

<sup>a</sup> School of Materials Science and Engineering, Nanyang Technological University, 50 Nanyang Avenue, Singapore 639798

<sup>b</sup> Energy Research Institute @ NTU (ERI@N), Nanyang Technological University, Research Techno Plaza, 50 Nanyang Drive, Singapore 637553

<sup>c</sup> Division of Physics and Applied Physics, School of Physical and Mathematical Sciences, Nanyang Technological University, 637371, Singapore

<sup>d</sup> CINTRA CNRS/NTU/Thales, UMI 3288, 50 Nanyang Drive, 637553, Singapore.

<sup>e</sup> Institute of Advanced Materials and Technology, University of Science and Technology Beijing, Beijing, 100083, China

<sup>f</sup> College of Materials Science and Engineering, Hunan University, Changsha, 410082, China

\* Corresponding authors: [liujilei@hnu.edu.cn](mailto:liujilei@hnu.edu.cn)/[liuj0058@e.ntu.edu.sg](mailto:liuj0058@e.ntu.edu.sg) (J. Liu),  
[Madhavi@ntu.edu.sg](mailto:Madhavi@ntu.edu.sg) (S. Madhavi), and [YZHuang@ntu.edu.sg](mailto:YZHuang@ntu.edu.sg) (Y. Huang)

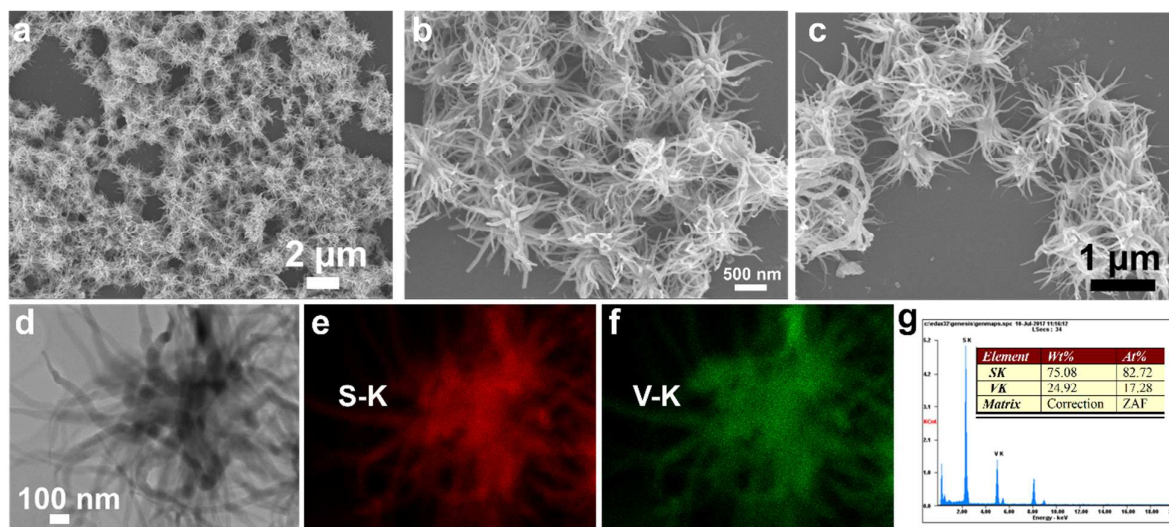

Figure. S1 SEM images and elemental mapping of urchin-like VS<sub>4</sub>.

Table S1 FTIR peaks and their assignments.

| Peaks | Band assignment               | Reference |
|-------|-------------------------------|-----------|
| 1631  | $\delta(\text{OH})$           | 1         |
| 1400  | Amorphous carbon              | 1         |
| 1200  | C-O-R                         | 2         |
| 980   | $\text{S}^{2-}(\text{V-S-V})$ | 2-4       |
| 550   | Terminal S stretching         | 2-4       |

v: stretching;  $\delta$ : bending.

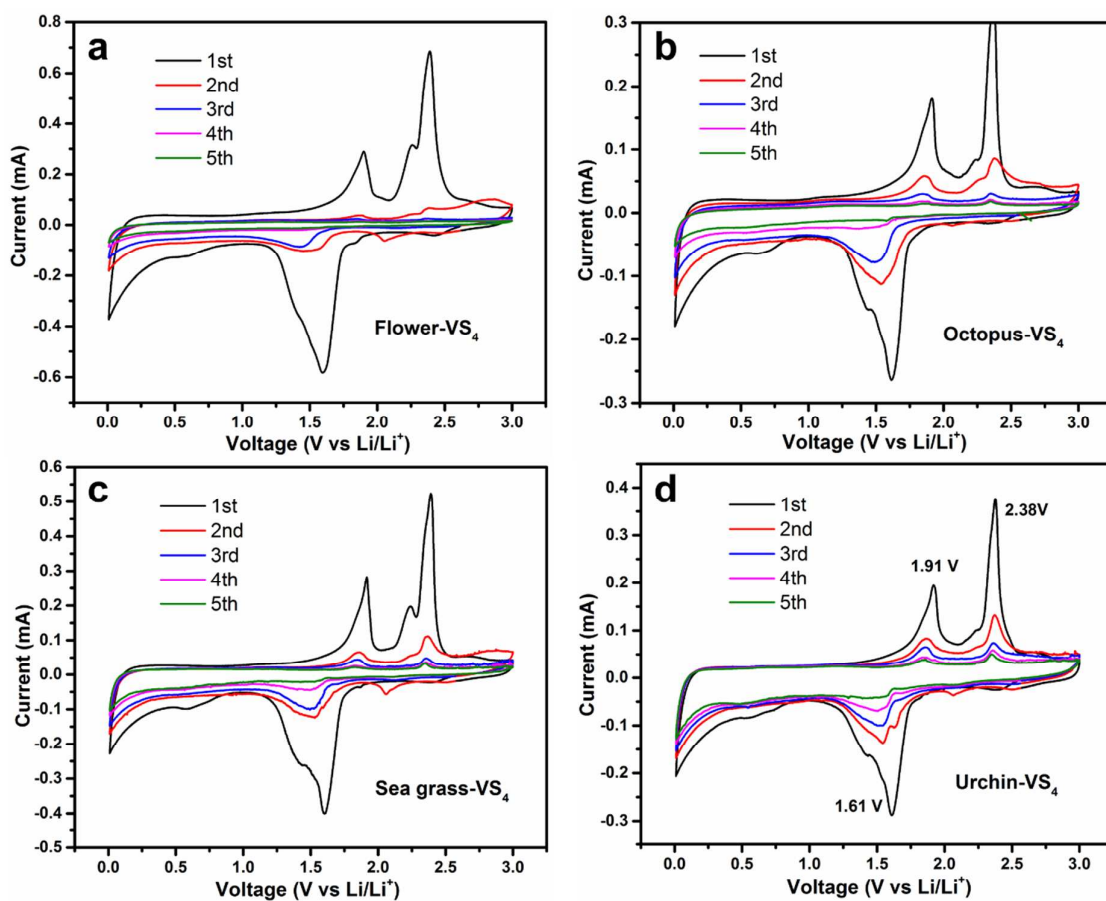

Figure. S2 First five CVs of: (a) flower- $\text{VS}_4$ ; (b) octopus- $\text{VS}_4$ ; (c) sea grass- $\text{VS}_4$ ; (d) urchin-like  $\text{VS}_4$  with a scan rate of  $0.2 \text{ mV s}^{-1}$  in the voltage range of  $0.01\text{--}3.00 \text{ V vs Li/Li}^+$ .

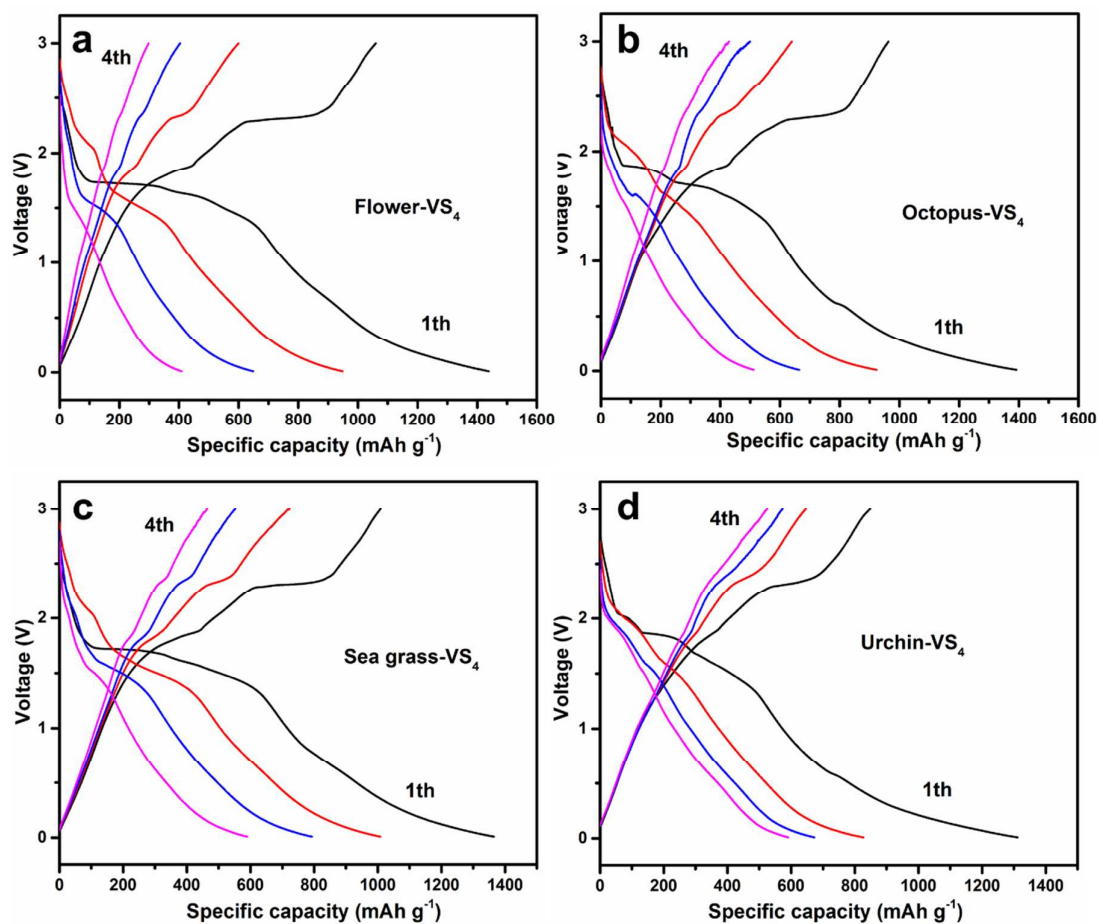

Figure. S3 First three galvanostatic discharge-charge profiles at a current rate of 0.1 A g<sup>-1</sup> in the voltage range of 0.1-3 V vs Li/Li<sup>+</sup> for: (a) flower-VS<sub>4</sub>; (b) octopus-VS<sub>4</sub>; (c) sea grass-VS<sub>4</sub>; (d) urchin-like VS<sub>4</sub>.

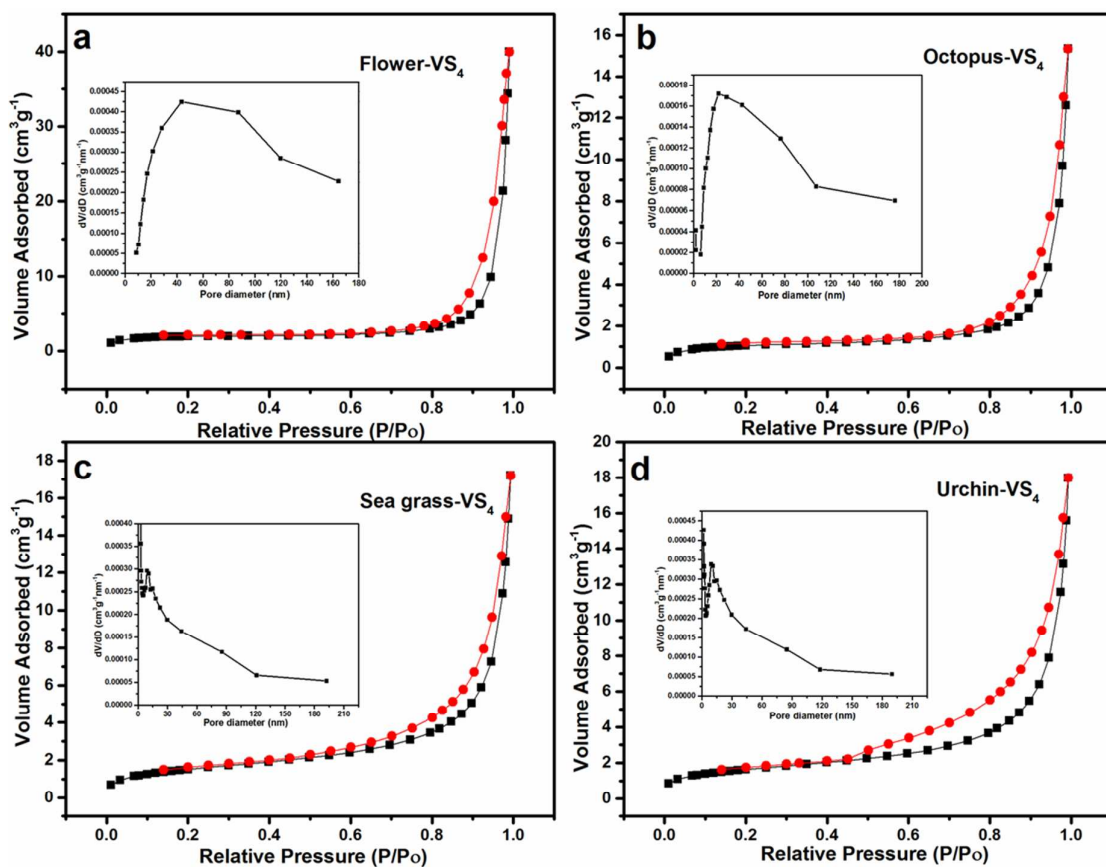

Figure. S4 The Nitrogen-adsorption-desorption isotherms of the (a) flower- $VS_4$ , (b) octopus- $VS_4$ , (c) sea grass- $VS_4$ , and (d) urchin-like  $VS_4$ . The insets are their corresponding pore size distribution.

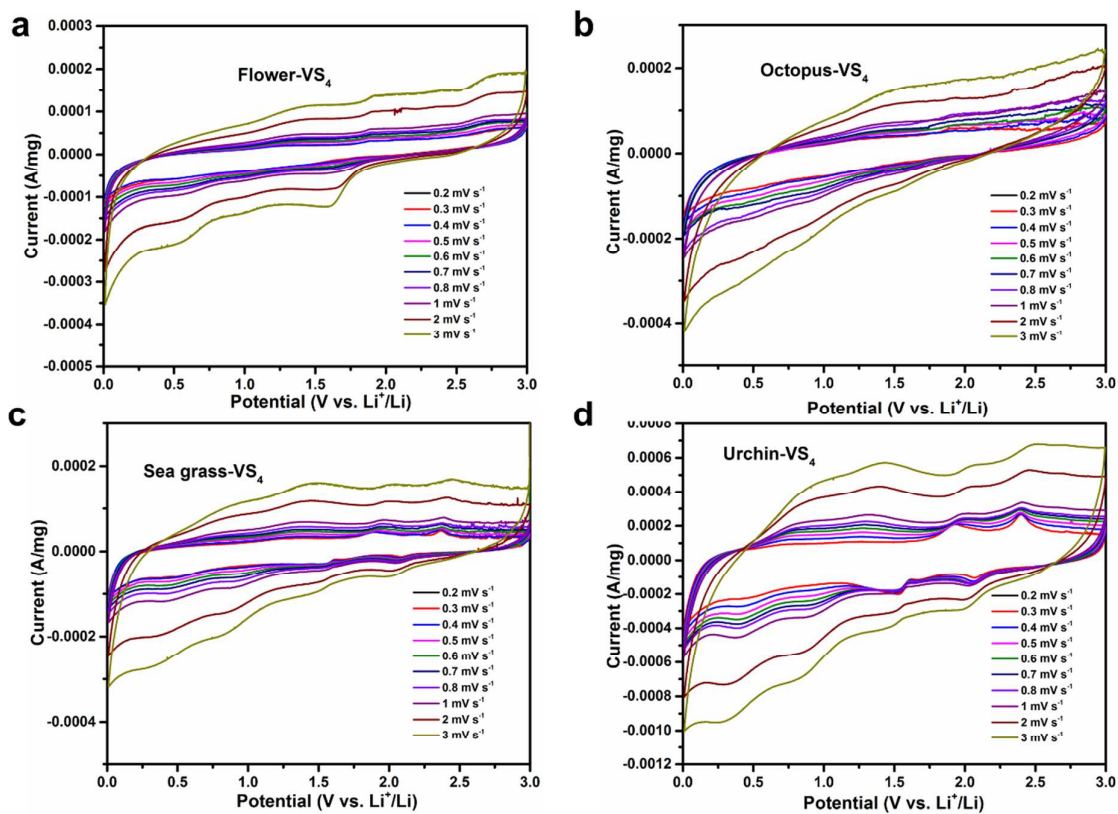

Figure. S5 CV curves of (a) flower-VS<sub>4</sub>; (b) octopus-VS<sub>4</sub>; (c) sea grass-VS<sub>4</sub>; (d) urchin-VS<sub>4</sub> at different scan rates between 0.01 to 3.00 V.



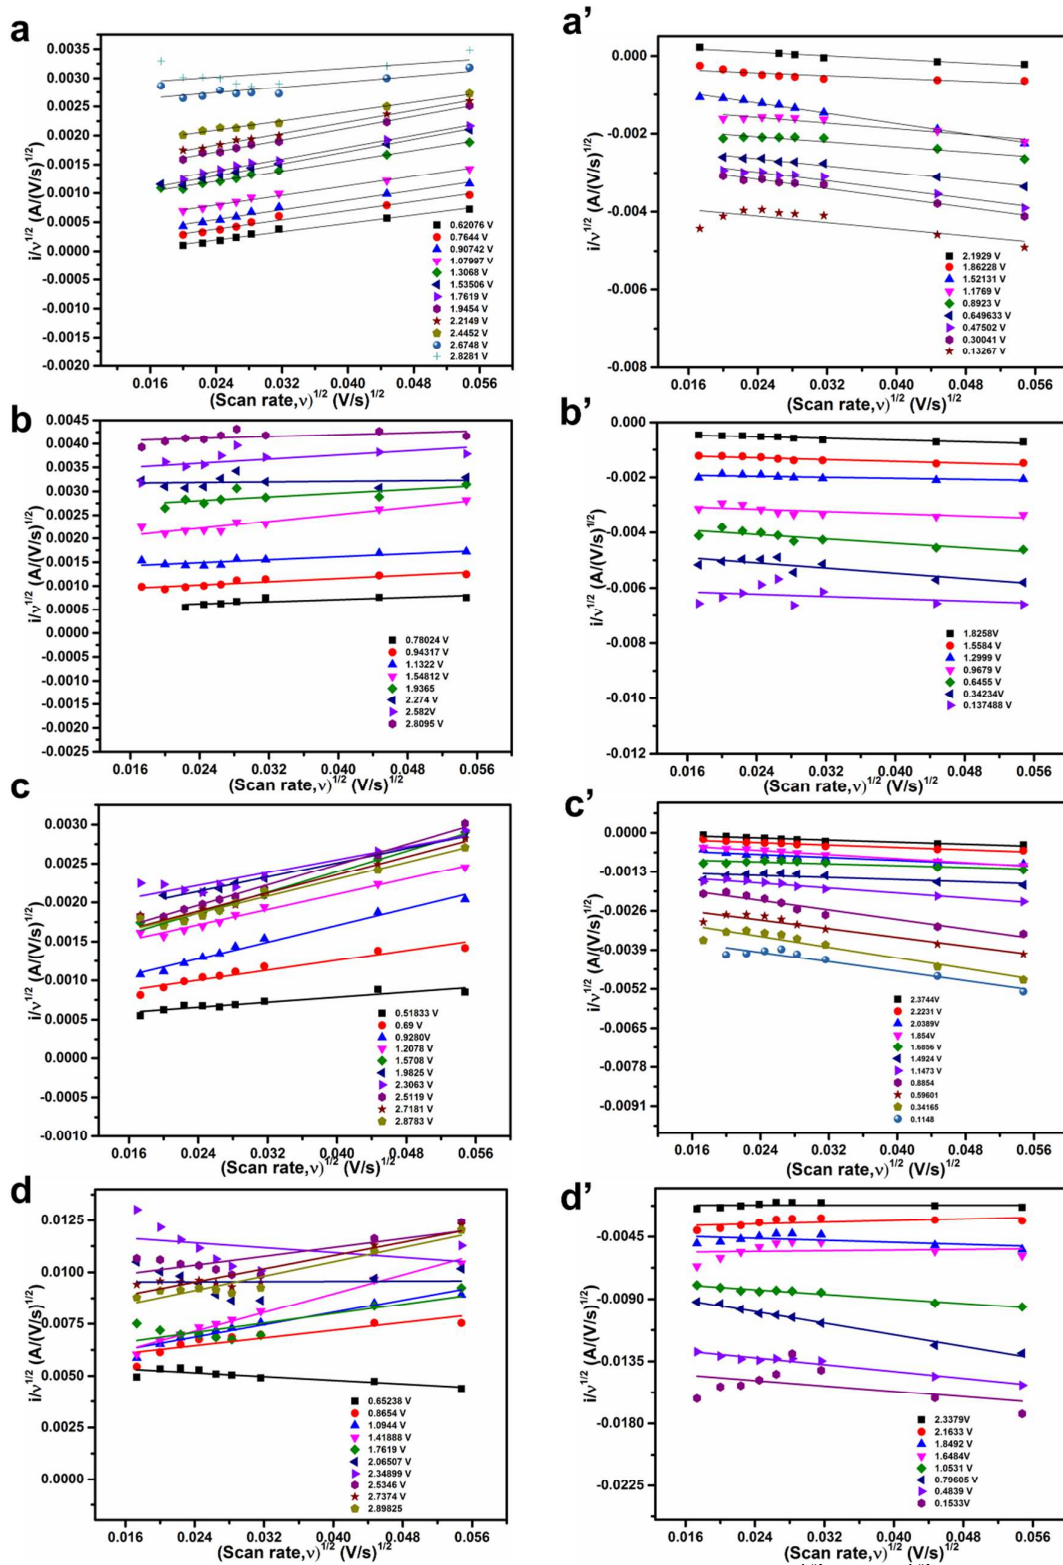

Figure. S6 (a, a'), (b, b'), (c, c') and (d, d') are the plots of  $v^{1/2}$  vs  $i/v^{1/2}$  for flower-VS<sub>4</sub>, octopus-VS<sub>4</sub>, sea grass-VS<sub>4</sub> and urchin-like VS<sub>4</sub> at both anodic and cathodic scan. The plots

are used for calculating constants  $k_1$  and  $k_2$  at different potentials of the cathodic scan and anodic scan.

The total current at a fixed potential can be described using the following equation:  $I(V) = k_1v + k_2v^{1/2}$ , where  $k_1v$  and  $k_2v^{1/2}$  represent the capacitive contribution and intercalation contribution, respectively.  $k_1$  and  $k_2$  can be obtained from the slope and y-axis intercept of the straight line:  $i(V)/v^{1/2} = k_1v^{1/2} + k_2$ , as shown in Figure. S6. Thus, the contribution from capacitive and intercalation can be calculated and each component contribution at scan rate of 0.3 mV/s is shown in Figure. 4b.

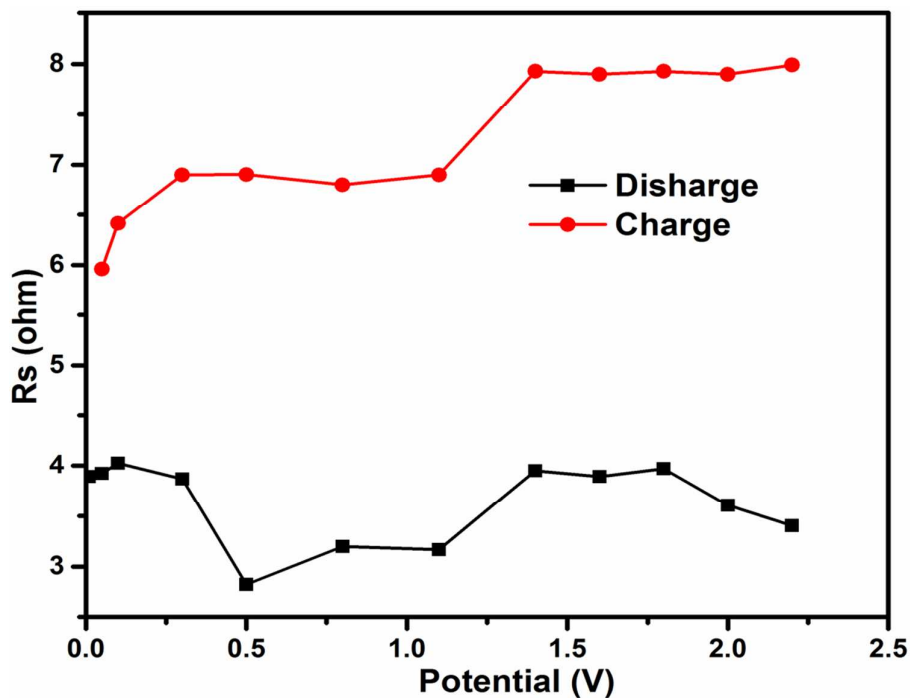

Figure. S7 Variation trend of  $R_s$  of urchin- $VS_4$ .

## References

1. Li, Q.; Wei, Q.; Sheng, J.; Yan, M.; Zhou, L.; Luo, W.; Sun, R.; Mai, L., Mesoporous  $Li_3VO_4/C$  Submicron-Ellipsoids Supported on Reduced Graphene Oxide as Practical Anode for High-Power Lithium-Ion Batteries. *Adv. Sci.* **2015**, *2*, 1500284.



2. Zhou, Y.; Li, Y.; Yang, J.; Tian, J.; Xu, H.; Yang, J.; Fan, W., Conductive Polymer-Coated VS<sub>4</sub> Submicrospheres As Advanced Electrode Materials in Lithium-Ion Batteries. *ACS Appl. Mater. Interfaces* **2016**, *8*, 18797-18805.
3. Fang, W.; Zhao, H.; Xie, Y.; Fang, J.; Xu, J.; Chen, Z., Facile Hydrothermal Synthesis of VS<sub>2</sub>/Graphene Nanocomposites with Superior High-Rate Capability as Lithium-Ion Battery Cathodes. *ACS Appl. Mater. Interfaces* **2015**, *7*, 13044-13052.
4. Lui, G.; Jiang, G.; Duan, A.; Broughton, J.; Zhang, J.; Fowler, M. W.; Yu, A., Synthesis and Characterization of Template-Free VS<sub>4</sub> Nanostructured Materials with Potential Application in Photocatalysis. *Industrial & Engineering Chemistry Research* **2015**, *54*, 2682-2689.
